# Supplementary material for: Analysis of 5-Azacytidine Resistance Models Reveals a Set of Targetable Pathways
Source: MDPI journal article supplement (doi:10.3390/cells11020223), 2022-01-11
Supplement: s1 [file s1]

| Cell line | AZA-S (IC50 <sup>AZA</sup> $\mu$ M) | AZA-R (IC50 <sup>AZA</sup> $\mu$ M) |
|-----------|-------------------------------------|-------------------------------------|
| OCI-M2    | 0.06                                | 2.52-12.87                          |
| MOLM-13   | 0.30                                | 2.36                                |
| SKM1      | 2.67                                | 5.94                                |

(A)

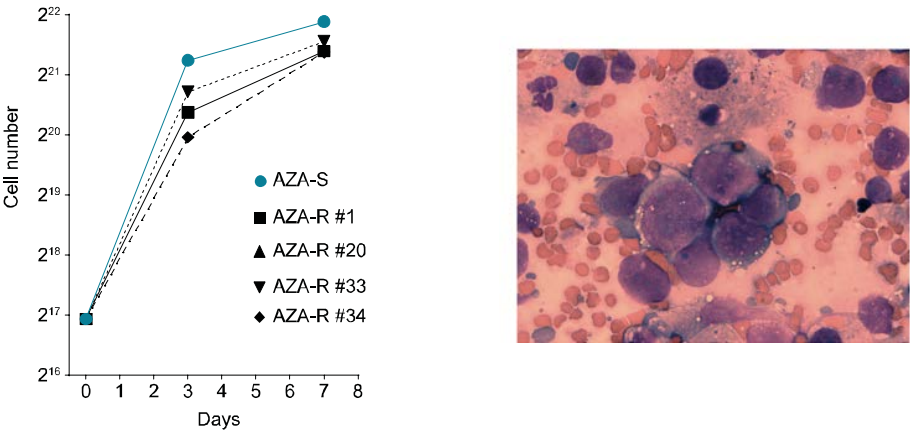

(B)

(C)

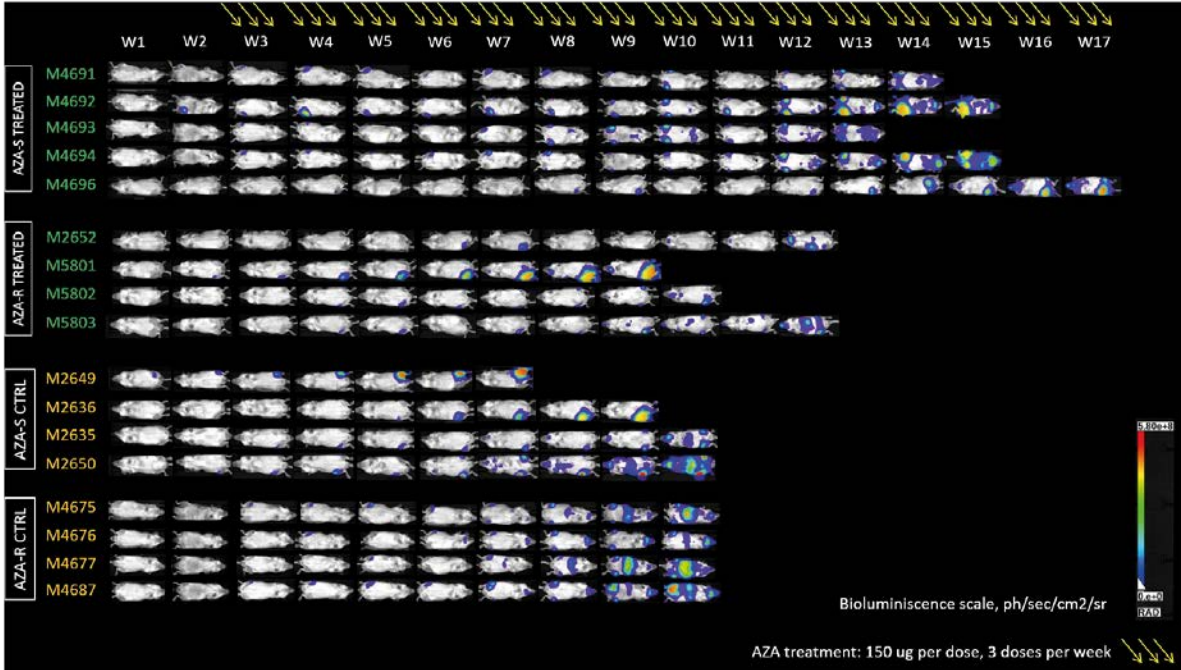

(D)

| Gene          | CDS mutation | AA mutation  | Impact                         | AZA-S | AZA-R #1 | AZA-R #20 | AZA-R #33 |
|---------------|--------------|--------------|--------------------------------|-------|----------|-----------|-----------|
| <i>BCORL1</i> | c.331T>C     | p.Phe111Leu  | missense variant               | 100%  | 100%     | 100%      | 100%      |
| <i>ASXL1</i>  | c.2444T>C    | p.Leu815Pro  | missense variant               | 100%  | 100%     | 100%      | 100%      |
| <i>TP53</i>   | c.215C>G     | p.Pro72Arg   | missense variant               | 99%   | 100%     | -         | -         |
| <i>TP53</i>   | c.821T>A     | p.Val274Asp  | structural interaction variant | 99%   | 100%     | 100%      | 99%       |
| <i>TET2</i>   | c.3251A>C    | p.Gln1084Pro | missense variant               | 50%   | 51%      | 46%       | 46%       |
| <i>CSF3R</i>  | c.2092C>T    | p.Arg698Cys  | missense variant               | 49%   | 68%      | -         | 67%       |
| <i>NRAS</i>   | c.181C>A     | p.Gln61Lys   | missense variant               | 46%   | 44%      | 46%       | 54%       |
| <i>ASXL1</i>  | c.2128G>C    | p.Gly710Arg  | missense variant               | 41%   | -        | -         | -         |

(E)

| Lineage            | Karyotype                                                                                                                                                                                                                                                                                                                                                                                                                                                                                                                            |
|--------------------|--------------------------------------------------------------------------------------------------------------------------------------------------------------------------------------------------------------------------------------------------------------------------------------------------------------------------------------------------------------------------------------------------------------------------------------------------------------------------------------------------------------------------------------|
| OCI-M2<br>AZA-S    | 45-53,X,der(X)t(X;8)(q13;?),+6,+7,del(7)(p12),+8,der(9)t(9;19)(p23;?)ins(19;21)(?;?),der(10)t(10;12)(p11.1;p13),der(12)t(10;12)(p11.1;p11.2),+14,+14,del(17)(q11q21.1),+20,der(21)t(19;21)*[cp9]<br><i>Comment: unstable –set of non-clonal chromosome aberrations</i>                                                                                                                                                                                                                                                               |
| OCI-M2<br>AZA-R #1 | 49,X,der(X)t(X;8)(q13;?),+6,+7,del(7)(p12),+dic(8;14)(p11.1;p11.1),der(9)t(9;19)(p23;?)ins(19;21)(?;?),der(10)t(10;12)(p11.1;p13),der(12)t(10;12)(p11.1;p11.2),del(17)(q11q21.1),der(19)t(1;19)(p?13;?p11),der(21)t(19;21)t(16;19)****[cp9]<br>49,idem,der(16)t(6;16)(?;p13.3)[cp3]<br><i>Comment: relatively stable – two clones and other mitosis with non-clonal chromosome aberrations, 4x polyploidy</i>                                                                                                                        |
| CDX                | 51,X,der(X)t(X;8)(q13;?),+2,dup(2)(q?),+6,+8,der(9)t(9;19)(p23;?)ins(19;21)(?;?),der(10)t(10;12)(p11.1;p13),der(12)t(10;12)(p11.1;p11.2),der(13)t(13;15)(q34;?q26),+14,del(17)(q11q21.1),+20,der(21)t(19;21)*[10]<br>50,X,der(X)t(X;7)(p11.2;?)t(X;8)(q21;?),+6,+8,der(9)t(9;19)(p23;?)ins(19;21)(?;?),der(10)t(10;12)(p11.1;p13),der(12)t(10;12)(p11.1;p11.2),+14,del(17)(q11q21.1),+20,der(21)t(19;21)*[2]<br><i>Comment: relatively stable – two clones and one mitosis with non-clonal chromosome aberrations, 1x polyploidy</i> |

AZA-S

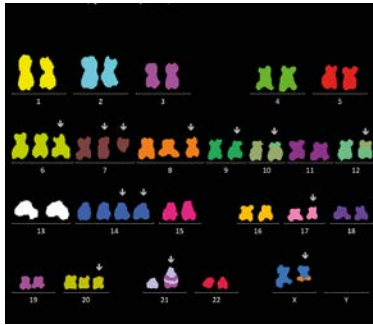

AZA-R, #1

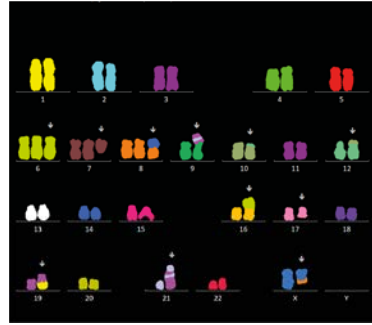

AZA-R, CDX

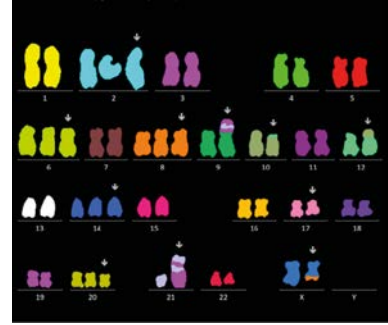

(F)

| TYPE      | EFFECT                                 | IMPACT | GENE     |
|-----------|----------------------------------------|--------|----------|
| SNV       | stop_gained                            | HIGH   | CFHR3    |
| Insertion | frameshift_variant                     | HIGH   | OR2T35   |
| Insertion | frameshift_variant                     | HIGH   | PRDM15   |
| SNV       | structural_interaction_variant         | HIGH   | NONO     |
| SNV       | structural_interaction_variant         | HIGH   | ARSB     |
| SNV       | structural_interaction_variant         | HIGH   | TP53     |
| Deletion  | frameshift_variant                     | HIGH   | PKD1L3   |
| Deletion  | structural_interaction_variant         | HIGH   | POLRMT   |
| SNV       | start_lost                             | HIGH   | OTOR     |
| SNV       | start_lost                             | HIGH   | TSR3     |
| SNV       | structural_interaction_variant         | HIGH   | AKR1C2   |
| SNV       | structural_interaction_variant         | HIGH   | CTH      |
| SNV       | structural_interaction_variant         | HIGH   | TPSAB1   |
| SNV       | structural_interaction_variant         | HIGH   | ACOT4    |
| Deletion  | frameshift_variant                     | HIGH   | TMEM25   |
| SNV       | structural_interaction_variant         | HIGH   | IL12B    |
| Deletion  | frameshift_variant                     | HIGH   | CA14     |
| SNV       | splice_donor_variant&intron_variant    | HIGH   | MCPH1    |
| SNV       | splice_acceptor_variant&intron_variant | HIGH   | EXO1     |
| SNV       | splice_acceptor_variant&intron_variant | HIGH   | PLA2G4D  |
| Insertion | frameshift_variant                     | HIGH   | MTHFD2   |
| SNV       | stop_gained                            | HIGH   | CNTR0B   |
| SNV       | splice_acceptor_variant&intron_variant | HIGH   | KIAA0196 |
| Insertion | frameshift_variant&stop_gained         | HIGH   | UXS1     |
| Complex   | structural_interaction_variant         | HIGH   | ACOT4    |
| Complex   | stop_gained                            | HIGH   | DRAP1    |
| Insertion | frameshift_variant                     | HIGH   | CEP162   |
| SNV       | stop_gained                            | HIGH   | HABP2    |
| Deletion  | frameshift_variant                     | HIGH   | HCN2     |
| SNV       | structural_interaction_variant         | HIGH   | ANGPT2   |
| SNV       | structural_interaction_variant         | HIGH   | FLT3     |

| TYPE      | EFFECT                                 | IMPACT | GENE     |
|-----------|----------------------------------------|--------|----------|
| SNV       | splice_donor_variant&intron_variant    | HIGH   | FAM227A  |
| Insertion | frameshift_variant                     | HIGH   | KRT4     |
| SNV       | structural_interaction_variant         | HIGH   | DDX3X    |
| Insertion | frameshift_variant                     | HIGH   | TAOK3    |
| SNV       | structural_interaction_variant         | HIGH   | ERCC1    |
| SNV       | stop_gained                            | HIGH   | FLG      |
| SNV       | stop_gained                            | HIGH   | IKZF3    |
| SNV       | stop_gained                            | HIGH   | FAT1     |
| SNV       | stop_gained                            | HIGH   | KRTAP1-1 |
| SNV       | structural_interaction_variant         | HIGH   | AKT1     |
| SNV       | protein_protein_contact                | HIGH   | PRIM2    |
| Insertion | frameshift_variant                     | HIGH   | ZFHX3    |
| Insertion | frameshift_variant                     | HIGH   | TBC1D10B |
| SNV       | stop_gained&splice_region_variant      | HIGH   | BCOR     |
| Deletion  | frameshift_variant                     | HIGH   | EEF1A1   |
| SNV       | stop_gained                            | HIGH   | PABPC3   |
| SNV       | structural_interaction_variant         | HIGH   | MYOM1    |
| Deletion  | frameshift_variant                     | HIGH   | SRD5A3   |
| SNV       | structural_interaction_variant         | HIGH   | SEC23A   |
| SNV       | stop_gained                            | HIGH   | SERGEF   |
| SNV       | splice_acceptor_variant&intron_variant | HIGH   | DGAT1    |
| Insertion | frameshift_variant                     | HIGH   | EGR1     |
| Insertion | frameshift_variant                     | HIGH   | CARF     |
| SNV       | structural_interaction_variant         | HIGH   | EGFR     |
| SNV       | stop_gained                            | HIGH   | GTF2H1   |
| SNV       | protein_protein_contact                | HIGH   | DHH      |
| SNV       | structural_interaction_variant         | HIGH   | RAB11A   |
| Deletion  | frameshift_variant                     | HIGH   | CCDC63   |
| SNV       | stop_gained                            | HIGH   | MYBPHL   |
| SNV       | stop_gained                            | HIGH   | BTN2A1   |
| SNV       | structural_interaction_variant         | HIGH   | ROR2     |
| SNV       | structural_interaction_variant         | HIGH   | MEP1B    |
| SNV       | protein_protein_contact                | HIGH   | CTNNB1   |
| SNV       | structural_interaction_variant         | HIGH   | AP4M1    |
| SNV       | structural_interaction_variant         | HIGH   | TFRC     |
| SNV       | splice_donor_variant&intron_variant    | HIGH   | QTRT1    |
| SNV       | stop_lost                              | HIGH   | ZNF442   |
| SNV       | structural_interaction_variant         | HIGH   | AIFM1    |
| SNV       | stop_gained                            | HIGH   | CXCR3    |

(G)

| Gene     | CDS mutation            | AA mutation  | Impact                                | AZA-S | AZA-R #1 | AZA-R #20 | AZA-R #33 |
|----------|-------------------------|--------------|---------------------------------------|-------|----------|-----------|-----------|
| FLG      | c.6442G>T               | p.Gly2148*   | stop gained                           | 0%    | 43%      | 46%       | 44%       |
| ASTE1    | c.1969delA              | p.Arg657fs   | frameshift variant                    | 0%    | 14%      | 16%       | 11%       |
| SRD5A3   | c.825_829delAACTT       | p.Thr276fs   | frameshift variant                    | 0%    | 18%      | 18%       | 14%       |
| SLC9B1   | c.913C>T                | p.Arg305*    | stop gained                           | 0%    | 26%      | 31%       | 23%       |
| FAT1     | c.13128C>A              | p.Cys4376*   | stop gained                           | 0%    | 42%      | 49%       | 33%       |
| PRIM2    | c.586C>G                | n/a          | protein protein contact               | 0%    | 21%      | 41%       | 27%       |
| EEF1A1   | c.22_23delAT            | p.Ile8fs     | frameshift variant                    | 0%    | 24%      | 27%       | 26%       |
| HGC6.3   | c.451_452delCAinsACAC   | p.Gln151fs   | frameshift variant&missense variant   | 0%    | 14%      | 11%       | 12%       |
| MTCH2    | c.807_808delGTinsAG     | p.TrpCys269* | stop gained                           | 0%    | 25%      | 23%       | 22%       |
| TRIM64B  | c.377delG               | p.Ser126fs   | frameshift variant                    | 0%    | 20%      | 11%       | 18%       |
| C12orf49 | c.375_385delCAGCGCCTATG | p.Cys125fs   | frameshift variant                    | 0%    | 19%      | 14%       | 21%       |
| TAOK3    | c.2163dupA              | p.Gln722fs   | frameshift variant                    | 0%    | 53%      | 55%       | 48%       |
| AKT1     | c.430C>G                | p.Arg144Gly  | structural interaction variant        | 0%    | 30%      | 32%       | 29%       |
| IKZF3    | c.1055C>G               | p.Ser352*    | stop gained                           | 0%    | 45%      | 42%       | 46%       |
| RALBP1   | c.1063C>T               | p.Arg355*    | stop gained                           | 0%    | 11%      | 10%       | 11%       |
| ERCC1    | c.495C>G                | p.Ala165Ala  | structural interaction variant        | 0%    | 53%      | 44%       | 47%       |
| FAM227A  | c.372+1G>C              | n/a          | splice donor variant&intron variant   | 0%    | 50%      | 55%       | 63%       |
| DDX3X    | c.1181G>T               | p.Arg394Leu  | structural interaction variant        | 0%    | 60%      | 49%       | 52%       |
| RBMX     | c.902_903delCGinsTGCC   | p.Pro301fs   | frameshift variant&synonymous variant | 0%    | 14%      | 12%       | 13%       |

(H)

| Code  | Sex | Age (Y) | subtype | IPSS-R       | Therapy (1) | Additional drug | Cycles |
|-------|-----|---------|---------|--------------|-------------|-----------------|--------|
| P3527 | F   | 71      | CMML2   | NA           | Azacytidine | none            | 12     |
| P3106 | M   | 74      | EB1     | Very High    | Azacytidine | none            | 24     |
| P5894 | M   | 76      | EB1     | Intermediate | Azacytidine | Pevonedistat    | 23     |
| P5511 | M   | 73      | EB1     | Intermediate | Azacytidine | Pevonedistat    | 6      |

| Response at cycle 4 |       |               |        |
|---------------------|-------|---------------|--------|
| Code                | or 8  | Therapy (2)   | Cycles |
| P3527               | CR    | LD-AraC       | 1      |
| P3106               | CR    | Guadecitabine | 1      |
| P5894               | SD-HI | LD-AraC       | 2      |
| P5511               | SD    | Rigosertib    | 6      |

(I)

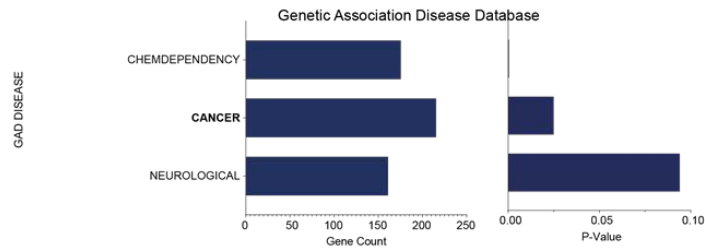

Annotation of AZA-R DNA variants showed significant involvement of AZA-R variants in several **GAD\_disease** (Genetic Association Disease Database) categories such as cancer (X axes represent gene count and p-value).

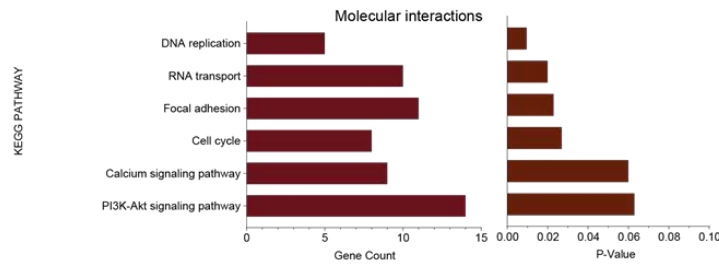

**KEGG** tool showed involvement in DNA replication, cell cycle and PI3K-AKT signaling pathway (X axes represent gene count and p-value).

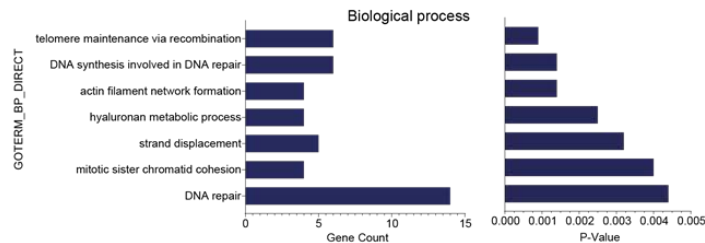

Analysis of the gene ontology in terms of biological process (**GOTERM\_BP\_DIRECT**) revealed the involvement in telomere length maintenance, chromatid cohesion, DNA repair and base excision repair or regulation of transcription. (X axes represent gene count and p-value).

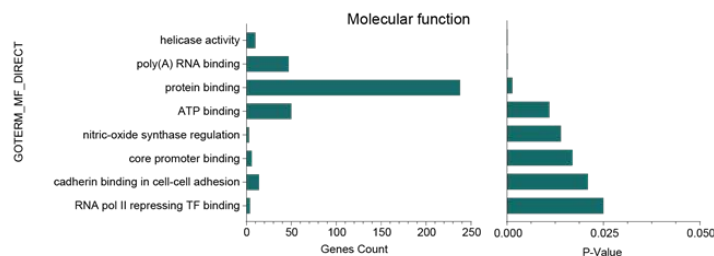

Molecular function analysis of AZA-R variants (**GOTERM\_MF\_DIRECT**) identified involvement in helicase activity, poly(A) RNA binding, protein binding, and ATP binding (X axes represent gene count and p-value).

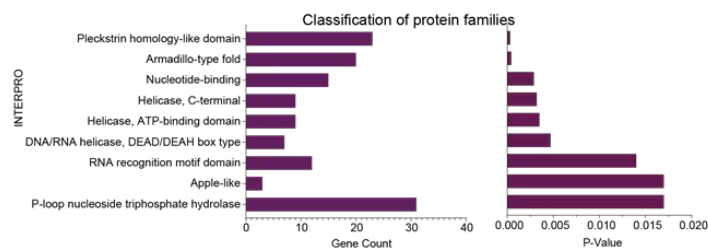

Analysis of AZA-R variants in terms of protein domains by **INTERPRO** showed significant involvement of Pleckstrin homology-like domain, Armadillo-like component, or RNA binding (X axes represent gene count and p-value).

(J)

| WES variants (combined)            | Categories (gene count)              | p value | Genes                                                                        |
|------------------------------------|--------------------------------------|---------|------------------------------------------------------------------------------|
| GAD_disease                        | cancer (96)                          | 2E-02   | AKT1, BRCA2, ERCC, FANCD2, FANCI, IKZF3, SMARCA2, WT1, RUNX1                 |
| UP_KEYWORDS                        | alternative splicing (304)           | 7E-13   | BCOR, POLD3, SMARCA2, CDC7, CHD7, HDAC2, HDAC6, STAG2                        |
|                                    | protein phosphorylation (253)        | 1E-12   | DDX3X, REST, ACVR1, EVI5, EGFR, JMD1C, MKI67, MAPK6, NOC1, PRMT6, SMC3       |
| KEGG pathway                       | DNA replication (5)                  | 1E-02   | POLD3, DNA2, PRIM1, PRIM2                                                    |
|                                    | cell cycle (8)                       | 3E-02   | MAD2L2, CDC7, HDAC2, ORC2, STAG2, SMC3                                       |
|                                    | PI3K signaling (14)                  | 5E-02   | AKT1, EGFR, HGF, PIK3R3, PTK2                                                |
| GOTERM_BP                          | telomere length maintenance (6)      | 9E-04   | BRCA2, POLD3, DNA2, WRN, PRIM1, PRIM2                                        |
|                                    | chromatid cohesion (4)               | 4E-03   | MAU2, NIPBL, PDS5B, SMC3                                                     |
|                                    | DNA & base excision repair (20)      | 4E-03   | DNA2, RAD51AP1, RBBP8, WRN, FANCD2, FANCI, TAOX3, SMC3                       |
|                                    | regulation of transcription (20)     | 5E-02   | BC1L10, SPI100, ANKRD49, EGR1, HDAC2, IRF6, RUNX1, SKAP1, ZFXH3, ASXL1       |
| GOTERM_MF                          | helicase activity (10)               | 2E-04   | SMARCA2, CHD7, DNA2, DDX3X, DDX60L, DHX36, DDX50, DDX60                      |
|                                    | poly(A) RNA binding (47)             | 2E-04   | RBM25, RBM27, TSR1, PABPC1, PARP12, TCERG1, SRFBP1                           |
|                                    | protein binding (238)                | 1E-03   | AKT1, ERCC1, BRCA2, FANCD2, CHD7, EGFR, IKZF3, CDC7, MAP3K7                  |
|                                    | ATP binding (50)                     | 1E-02   | DDX37, DDX60L, SMARCA2, CHD7, PDS5B, SMC3                                    |
| BIOKARTA                           | healing and ATRIL pathways (8)       | 4E-02   | AKT1, PTK2B, PTK, EGFR, MEK2D                                                |
| INTERPRO                           | Pleckstrin homology-like domain (23) | 3E-04   | AKT1, PLCB3, PTK2B, PTK, SKAP1, TRIO                                         |
|                                    | Armadillo-like component (20)        | 4E-04   | PDS5B, BHLHB9, TERB1, USP24, USP9Y, ULK4                                     |
|                                    | Nucleotide binding (15)              | 3E-03   | DDX50, RBM25, RBM27, RBMX2, RNP33, UPF3B, CSTF2T, PABPC1, PABPC3, SRRT       |
|                                    | Helicase, ATP-binding domain (25)    | 4E-03   | DDX3X, DDX60L, DHX36, DDX50, DDX60, WRN, CHD7, SMARCA2                       |
| BIOGRID                            | SOC56 (4)                            | 3E-03   | APPL1, CLNK                                                                  |
|                                    | CBL (11)                             | 3E-03   | EGFR, FRS2, PIK3R3, PTK2B, PTK2, ARHGEF6                                     |
|                                    |                                      |         |                                                                              |
|                                    |                                      |         |                                                                              |
| WES variants (OCI-M2 AZA-R unique) | Categories (gene count)              | p value | Genes                                                                        |
| GAD_disease                        | Tobacco Use Disorder (84)            | 7E-05   | FANCD2, SMARCA2, JMD1C, WT1, NOS1, GRB14                                     |
| UP_KEYWORDS                        | alternative splicing (228)           | 1E-11   | FANCI, ERCC1, IKZF3, RAVR1, PRMT8, CEP76, CDC7, CARD19, SUN3, DNA2           |
|                                    | protein phosphorylation (181)        | 2E-08   | AKT1, BRCA2, DDX3X, DHX36, DDX50, ARHGAP5, SMYD2, CHD7, EGFR, PIP4K2C, PI4KB |
| KEGG pathway                       | PI3K signaling (11)                  | 3E-02   | INPP4A, MTMR4, PI4KB, PIP4K2C, PIK3R3                                        |
|                                    | Cancer (5)                           | 2E-02   | AKT1, ARHGAP5, EGFR, HGF, RELN                                               |
|                                    | Fanconi anemia (4)                   | 3E-02   | BRCA2, ERCC1, FANCD2, FANCI                                                  |
| GOTERM_BP                          | regulation of transcription (43)     | 4E-03   | IKZF3, SMARCA2, CHD7, HDAC2, WT1, DDX3X                                      |
|                                    | DNA repair (11)                      | 8E-03   | ERCC1, FANCD2, RAD51AP1, RBBP8, PDS5B                                        |
|                                    | cell cycle (9)                       | 4E-03   | MAPK6, EVI5, CYLD, APPL1                                                     |
| GOTERM_MF                          | telomere maintenance (5)             | 2E-03   | BRCA2, DNA2, PRIM1, PRIM2, WRN                                               |
|                                    | helicase activity (9)                | 1E-04   | DDX3X, DDX60L, DHX36, DDX50, SMARCA2, CHD7                                   |
|                                    | poly(A) RNA binding (33)             | 2E-04   | RBM25, RBM27, TSR1, PABPC1, PARP12, TCERG1, SRFBP1                           |
|                                    | protein binding (181)                | 1E-03   | AKT1, IKZF3, HBP1, RBBP8, REST, ARHGEF8, ARHGAP5, SMYD2, ACVR1               |
|                                    | ATP binding (38)                     | 1E-02   | DDX3X, DDX60L, SMARCA2, CHD7, CDC7, EGFR, MAP3K7, MAPK6                      |
| INTERPRO                           | Pleckstrin homology-like domain (16) | 5E-03   | AKT1, PTK2B, SKAP1, TRIO, GRB14                                              |
|                                    | Armadillo-like component (13)        | 1E-02   | ULK4, FRYL, USP24, PDS5B                                                     |
|                                    | Nucleotide binding (11)              | 1E-02   | DDX50, RBM25, RBMX2, RNP33, SRRT                                             |
|                                    | Helicase, ATP-binding domain (22)    | 2E-03   | DDX3X, DDX60L, DHX36, DDX50, DDX60, WRN, CHD7, SMARCA2                       |
| BIOGRID                            | SOC56 (4)                            | 3E-03   | APPL1, CLNK, EGFR, PIK3R3                                                    |
|                                    | Serine kinase (5)                    | 3E-03   | IKZF3, EGFR, GRB14                                                           |
|                                    |                                      |         |                                                                              |
|                                    |                                      |         |                                                                              |
| WES variants (Pts AZA-R unique)    | Categories (gene count)              | p value | Genes                                                                        |
| GAD_disease                        | Tobacco Use Disorder (78)            | 2E-03   | CTBP2, ETV6, CERC2, WRN, GRB14, MYH7, RUNX1, PRKCD, FOXJ3                    |
| UP_KEYWORDS                        | alternative splicing (224)           | 1E-06   | ETV5, DDX1, DDX17, BCOR, PRDM15, RBM26, RAD51AP1                             |
|                                    | protein phosphorylation (183)        | 2E-06   | ATR, CTBP2, MYSM1, RANBP2, SMAD4, AK2, CDC25A, CUL5, XPO5                    |
| KEGG pathway                       | cell cycle (9)                       | 2E-03   | ATR, E2F1, SMAD4, CDC25A, CDC7, CHEK2, HDAC2, PLK1, PRKDC                    |
|                                    | leukemia (5)                         | 4E-02   | CTBP2, RUNX1                                                                 |
| GOTERM_BP                          | regulation of transcription (29)     | 1E-02   | ETV5, ETV6, HDAC2, RUNX1, CTNNB1, EGFR                                       |
|                                    | DNA repair (10)                      | 3E-02   | POLA1, WRN, UVRAG, RAD51AP1, RECQL                                           |
|                                    | cell cycle (14)                      | 2E-02   | MKI67, PLK1, CDC25A, SMAD4, KIF2C, REG3A                                     |
| GOTERM_MF                          | protein binding (173)                | 4E-02   | BCOR, ATR, CTBP2, SMAD4, CDK12, HBP1, MKI67, NOD2, RUNX1                     |
|                                    | ATP binding (45)                     | 6E-04   | CDC7, MARK2, PLK1, PRKCD, CHEK2, AK2                                         |
|                                    | poly(A) RNA binding (37)             | 5E-04   | DDX1, DDX17, DHX36, DDX50, H1FX, ABT1, NOL7                                  |
|                                    | RNA binding (17)                     | 4E-02   | XPO5, PABPC1, PABPC3, RPL21, AHCLY1, RBM26, DIS3                             |
| BIOKARTA                           | cell cycle (9)                       | 3E-03   | CDC25A, CHEK2, PLK1, PRKDC                                                   |
| INTERPRO                           | Protein kinase domain (17)           | 3E-02   | CDC7, MARK2, TRIO, OLK4, TNK2, PRKDC                                         |
|                                    | Armadillo-like component (13)        | 2E-02   | ATR, CTNNB1, FHOD1, XPO5                                                     |
|                                    | Helicase, ATP-binding domain (6)     | 4E-02   | DDX1, DDX17, DHX36, DDX50, RECQL, WRN                                        |
| BIOGRID                            | TP53 (19)                            | 4E-03   | RAD23A, AGR1, CHEK2, PLK1, PRKCD                                             |
|                                    | CREBBP (9)                           | 3E-02   | CTNNB1, RUNX1, TDG, WRN                                                      |

(K)

**Figure S1:** Validation and Mutation screen of AZA-R model & MDS patients. **(A)** IC50AZA of the AZA-R MDS/AML cell lines used (OCI-M2, MOLM13, SKM1). **(B)** Analysis of cell proliferation of AZA-S vs four independent AZA-R subclones. **(C)** bone marrow cytology of OCI-M2 AZA-R cells derived from CDX mice. Cluster of myeloblasts is indicated by an arrow; **(D)** AZA-S and AZA-R cells were transplanted into NSGS mice and either treated with AZA (AZA-S/AZA-R TREATED) or with vehicle control (AZA-S/AZA-R CTRL). Luciferase signal of the tumor has been monitored each week (W). Therapy of 150  $\mu$ g AZA/mouse was applied 3 times a week indicated by yellow arrow. Evaluation of luciferase signal in control vs treated mice bearing AZA-S or AZA-R tumors. Unique mouse ID is shown in green or orange. **(E)** Using 33-gene MDS panel we identified variants with high impact in 6 genes previously coupled with MDS pathogenesis. Coding DNA sequence (CDS) mutation and aminoacid (AA) substitution is shown for each gene. Variant allele frequency VAF (%) is shown for the different clones on the right. **(F)** M-FISH summary of cytogenetic aberrations in AZA-S and AZA-R cells. Below are representative karyotypes from AZA-S, AZA-R prior and after extraction from CDX tumors. Note that some differences observed in the AZA-R CDX cells were not seen consistently within the clone, e.g., trisomy of chr3, chr14. **(G)** WES gene lists. Left panel: using WES we identified high-impact variants that were shared (N=188) among AZA-S and AZA-R subclones (variants with highest VAF are shown, full data set was deposited), right panel: a set of unique (N=349) AZA-R variants (variants with highest VAF are shown, full data set was deposited). In red: genes implicated in AZA resistance. **(H)** Unique variants of AZA-R. WES-identified 19 unique AZA-R variants that were identical across AZA-R clones (but not in AZA-S, green) and are

highly suspected to represent early transformation events for the evolution of the AZA-R phenotype. VAF (%) is shown for the different clones on the right. **(I)** MDS patients (N=4, P3527, P3106, P5894, P5511): P3527 (female, age of 71) was diagnosed with MDS-related CMML2, received 12 cycles of AZA (5+2+2, 75 mg/m<sup>2</sup>), and responded by complete remission. Upon loss of the response the patient received low dose ARA-C (10 days of 2x20mg s.c./28day cycle) but died as a result of progression-associated infection. Patient P3106 (male, age of 74) was MDS-EB1 (excess of blast 1), Very High Revised International Prognostic Index Score (IPSS-R) [17] Risk, received 24 cycles of AZA therapy, achieved complete remission (CR), and upon loss of response he received Guadecitabine (which is a next-generation hypomethylating agent whose active metabolite decitabine has a longer in-vivo exposure time) but died shortly after disease progression. Patient P5894 (male, age of 76) was MDS-EB1, Intermediate IPSS-R Risk, received AZA/Pevonedistat combination, achieved stable disease with hematologic improvement (SD-HI) after 4 cycles, eventually progressed to MDS/AML after 23 cycles, died after 2 cycles of Low-Dose AraC due to progression. Patient P5511 with MDS-EB1, intermediate IPSS-R risk, received AZA/Pevonedistat combination, progressed after 6 cycles and therefore therapy was changed to rigosertib, but patient died due to progression. **(J)** WES analysis of AZA-R cells. From top to bottom: GAD disease analysis, KEGG pathway - molecular interactions, GOTERM Biological process, GOTERM Molecular function, INTERPRO protein domain involvement. **(K)** WES analysis of AZA-R cells. Table listing the involved genes and pathways from GAD disease analysis, KEGG pathway - molecular interactions, GOTERM Biological process, GOTERM Molecular function, and INTERPRO protein domain involvement. Upper panel: combined analysis, middle panel: annotation of AZA-R variants from OCI-M2 cells, lower panel: annotation of AZA-R variants from AZA-resistant MDS patients.

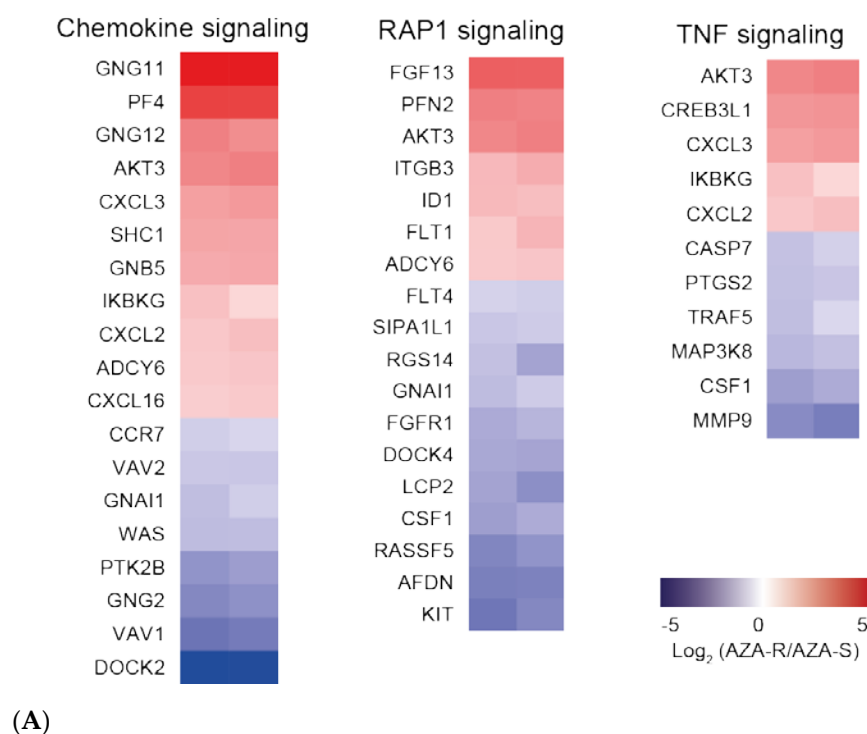



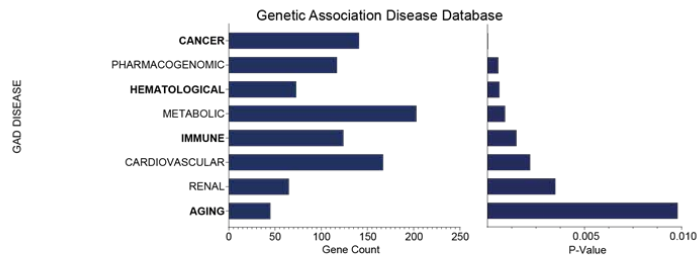

Annotation of differentially expressed mRNAs in AZA-R identified several **GAD\_disease** categories, with cancer being the most significant, pharmacogenomics, hematology, and metabolism (X axes represent gene count and p-value).

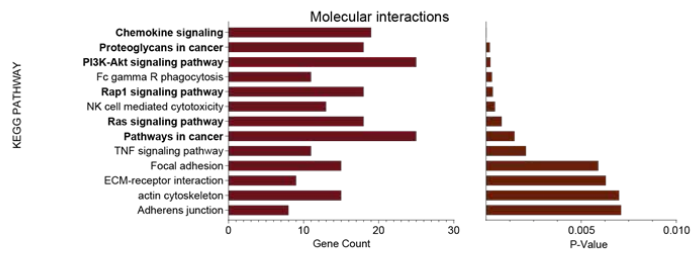

Analysis of signaling pathways by **KEGG** revealed involvement of the differentially expressed AZA-R mRNAs in chemokine signaling pathway, the PI3K-AKT signaling pathway, and the RAS signaling pathway (X axes represent gene count and p-value).

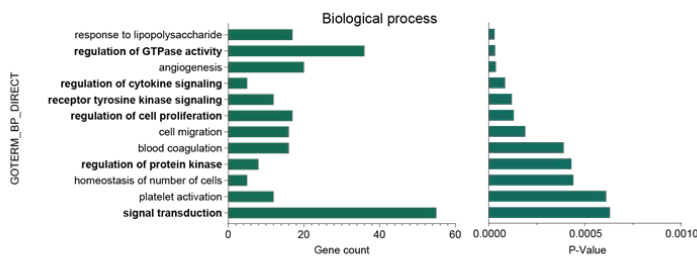

Analyses of biological processes (**GOTERM\_BP\_DIRECT**) in the differentially expressed AZA-R mRNA profile revealed cell proliferation and positive regulation of GTPase activity (X axes represent gene count and p-value).

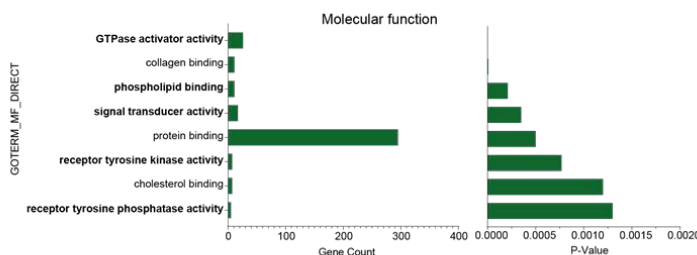

Molecular function analysis (**GOTERM\_MF\_DIRECT**) of AZA-R DE mRNA profile identified the most significant being the GTPase activity (X axes represent gene count and p-value).

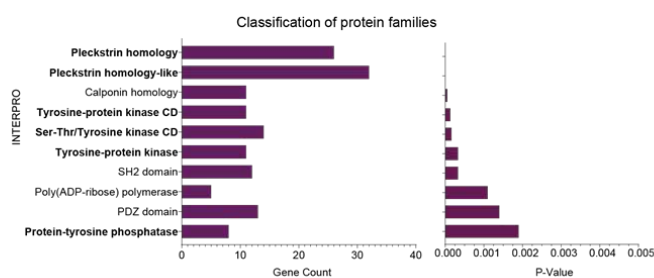

Analysis of DE AZA-R mRNAs using **INTERPRO** indicated involvement of the Pleckstrin homology-like domain and the Pleckstrin homology domain among the most significant ones (X axes represent gene count and p-value).

(B)

| DE mRNAs     | Categories (mRNA count)              | p-value | Genes                                                                               |
|--------------|--------------------------------------|---------|-------------------------------------------------------------------------------------|
| GAD_disease  | cancer (141)                         | 3E-05   | AKT3, IKZF1, IKZF2, ERG, KIT, SMAD3, CCND1, CDKN2A, CASP4, CASP7                    |
|              | hematology (117)                     | 6E-04   | IKZF1, IKZF3, ERG, SATB1, SMARCA2, RIN3, MAP3K8, GSTM1, CDKN2A, CDCA7, CDH2         |
|              | metabolism (203)                     | 9E-04   | KIT, SMAD6, SMAD3, WNT5B, ERBB3, FGFR1, FLT1, HOXA10, ID1, ID2, FOXB1, IRAK3, PTK2B |
| UP_KEYWORDS  | protein phosphorylation (290)        | 6E-10   | AKT3, DDX25, EHD2, EHD3, SMARCA1, SMARCA2, TAL1, FLT1, FLT4, PARP10, PTPN6, ABCA1   |
|              | alternative splicing (335)           | 3E-06   | ABCA3, POU2F2, RBPMS2, SATB1, SIMC1, TEAD4, CDC14B, CSF2RBENG, FZD3, PARP14, PARP3  |
| KEGG pathway | chemokine signaling pathway (19)     | 5E-03   | CXCL2, CXCL3, CXCL7, CXCL16, AKT3, PTK2B, VAV1, VAV2                                |
|              | PI3K signaling (25)                  | 2E-04   | AKT3, CCND1, CSF1                                                                   |
| GOTERM_BP    | RAS signaling pathway (18)           | 2E-02   | CSF1, FGF13, SYK, FLT1, FLT4, FGFR1, KIT, AKT3                                      |
|              | cell proliferation (17)              | 5E-02   | BMX, KIT, S100A11, CDCA7, HOXD13, PTK2B, TAL1                                       |
| GOTERM_MF    | regulation of GTPase activity (36)   | 3E-05   | DLC1, GDI1, RIN3, RASGEF1B, SHC1, AGAP1-3, GNB5, RAP1GAP2                           |
|              | GTPase activity (26)                 | 7E-07   | RAP1GAP2, RIN3, RINL, RGS14, RGS20, SIPA1L1, SYDE1                                  |
|              | signal transducer activity (17)      | 3E-04   | BMX, ERG, GNA15, GNAI1, GNB5, GNG11, GNG12, PLCL1, PTK2B                            |
|              | phospholipid binding (11)            | 2E-04   | ABCA1, AGAP1, SGIP1, SHC1, STAP1                                                    |
| INTERPRO     | Pleckstrin homology-like domain (32) | 2E-04   | SHC1, STAP1, PLEKHA4, FLEKHA6, PLEKHO1, PLEKHG4, PTPN13, VAV1, VAV2                 |
|              | Pleckstrin homology domain (26)      | 1E-06   | AKT3, BMX, CDH2, AGAP1, ASAP2, ASAP3, ARHGEF6                                       |
| BIOGRID      | CBL (17)                             | 1E-05   | KIT, SHC1, CSF1, SMAD3, FLT1, SYK, VAV1, VAV2                                       |

(C)

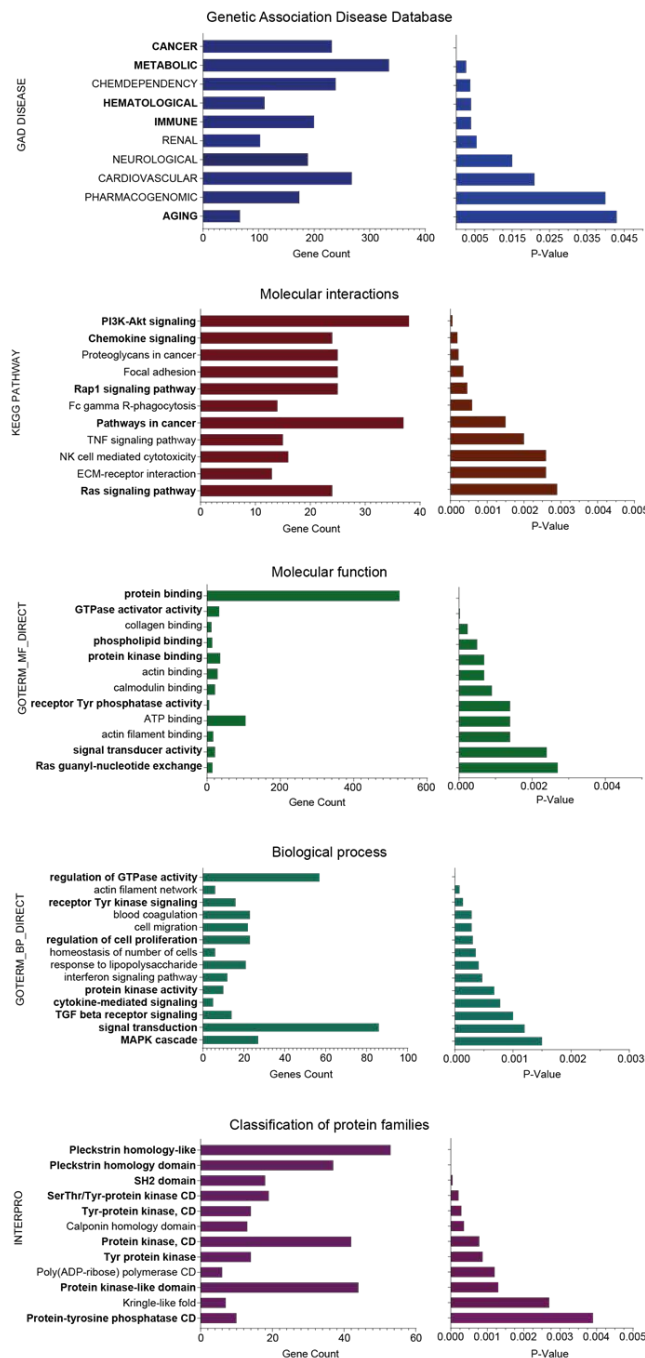

Annotation of differentially expressed DNA variants and mRNAs in AZA-R identified several **GAD\_disease** categories, with cancer being the most significant, followed by metabolism and hematology (X axes represent gene count and p-value).

Analysis of signaling pathways by **KEGG** revealed involvement of the DNA variants and differentially expressed AZA-R mRNAs in the PI3K-AKT pathway and chemokine signaling, and the RAS signaling pathway or cancer (X axes represent gene count and p-value).

Analyses of biological processes (**GOTERM\_BP\_DIRECT**) in DNA variants and the differentially expressed AZA-R mRNA profile revealed protein binding, GTPase activity, phospholipid binding, protein kinase binding among the most significant (X axes represent gene count and p-value).

Molecular function analyses (**GOTERM\_MF\_DIRECT**) of AZA-R DNA variants and DE mRNA profile identified the most significant being the GTPase activity, Tyr kinase signaling, cell proliferation or cytokine mediated signaling among the most significant (X axes represent gene count and p-value).

Analysis of DNA variants and DE AZA-R mRNAs using **INTERPRO** indicated involvement of the Pleckstrin homology-like domain and the Pleckstrin homology domain, SH2 domain, protein kinase domain and protein phosphatase among the most significant ones (X axes represent gene count and p-value).

(D)



**Figure S2:** RNAseq and DAVID annotations of AZA-R profiles. **(A)** Transcriptomic analysis of AZA-R vs AZA-S cells. Heatmaps – showing mRNA expression log2 (AZA-R/AZA-S) in two replicates of KEGG-enriched pathways; note that some mRNAs are involved in more than one (see Results, *section 3.3*). **(B)** RNAseq data analysis of AZA-R cells. From top to bottom: GAD disease analysis, KEGG pathway - molecular interactions, GOTERM Biological process, GOTERM Molecular function, INTERPRO protein domain involvement. **(C)** RNAseq analysis of AZA-R cells. Table listing the involved genes and pathways from GAD disease analysis, KEGG pathway - molecular interactions, GOTERM Biological process, GOTERM Molecular function, and INTERPRO protein domain involvement. **(D)** WES and RNAseq combined analysis of AZA-R. From top to bottom: GAD disease analysis, KEGG pathway - molecular interactions, GOTERM Biological process, GOTERM Molecular function, INTERPRO protein domain involvement.

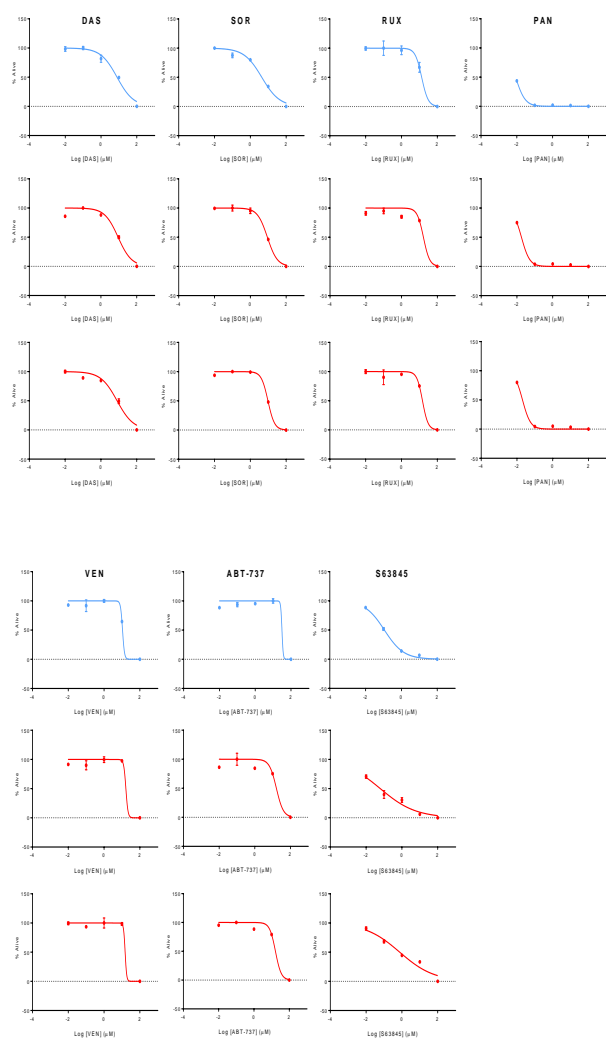

| DRUG               | IC <sub>50</sub> (μM) |                       |                     |
|--------------------|-----------------------|-----------------------|---------------------|
|                    | AZA-S                 | AZA-R <sup>mean</sup> | AZA-R <sup>SD</sup> |
| Azacitidine (AZA)  | 0.063                 | 10.833                | 1.768               |
| Dasatinib (DAS)    | 7.894                 | 8.291                 | 0.732               |
| Sorafenib (SOR)    | 4.383                 | 8.201                 | 1.970               |
| Ruxolitinib (RUX)  | 13.500                | 15.507                | 1.087               |
| Panobinostat (PAN) | 0.009                 | 0.020                 | 0.002               |
| Venetoclax (VEN)   | 10.590                | 14.410                | 2.133               |
| ABT-737            | 31.490                | 16.503                | 0.172               |
| S63845             | 0.112                 | 0.438                 | 0.350               |
| Idelalisib (IDE)   | 10.200                | 12.840                | 3.026               |
| MK2206             | 0.246                 | 0.257                 | 0.063               |

**(A)**

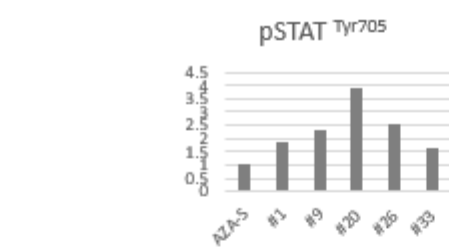

pSTAT3 79.86 kDa

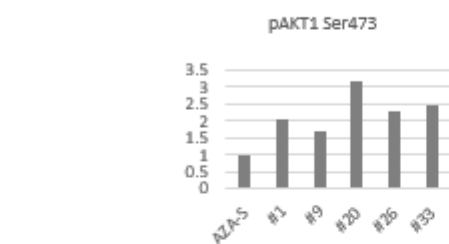

pAKT1 60 kDa

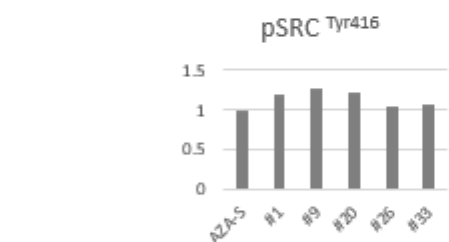

pSRC 60 kDa

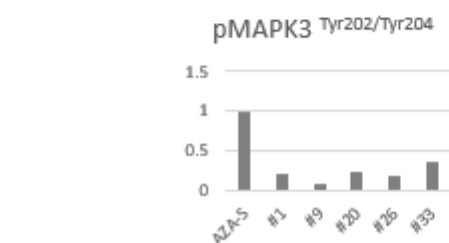

pMAPK3 44.42 kDa

Histone H3 17 kDa

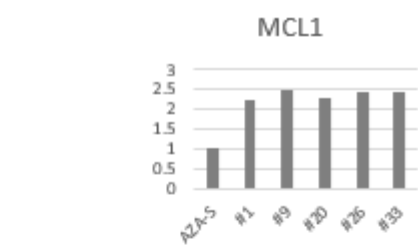

MCL1 40 kDa

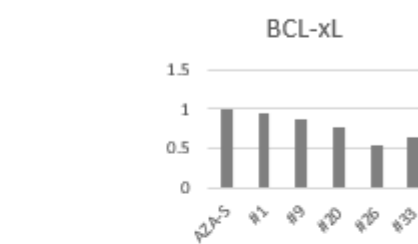

BCL-xL 30 kDa

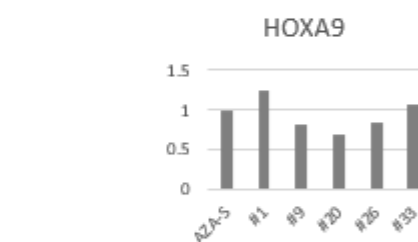

HOXA9 30 kDa

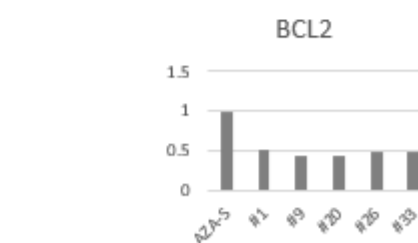

BCL2 26 kDa

Histone H3 17 kDa

(B)

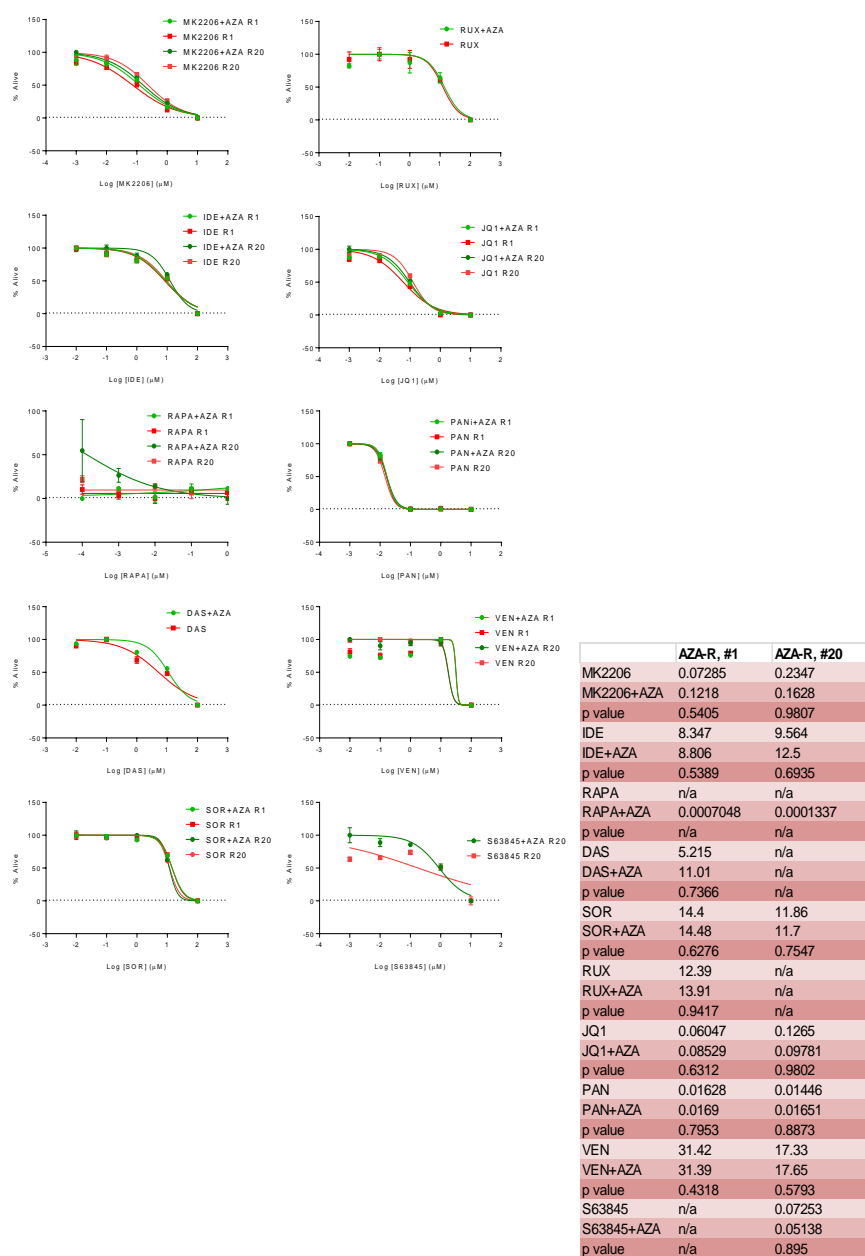

(C)

**Figure S3:** WST1 assay of AZA-R inhibitors in monotherapy and with AZA; Immunoblotting analysis for candidate pathways. (A) WST1 assay, AZA-S and AZA-R cells were used. The following inhibitors (DAS, SOR, RUX, PAN, VEN, ABT-737 and S63845) were evaluated in monotherapy using WST1 assay. IC<sub>50</sub> for each drug is shown in the table (Idelalisib, JQ1, PAN, and MK2206 data are shown in Fig. 3). (B) Western blot analysis of AZA-S and AZA-R subclones. Probed proteins are listed on the top of the figures, Y axis represents density of the bands of gels shown below the histograms, X axis depicts samples of cell lysates. Histone H3 detection represents a loading control. (C) WST1 assay, two AZA-R (1, 20) subclones were used. Additive or synergistic effect of the inhibitors (MK2206, IDE, RAPA, DAS, SOR, RUX, JQ1, PAN, VEN, S63845) was tested. Red color indicates monotherapy, green indicates combination with AZA (1 $\mu$ M). IC<sub>50</sub> for each drug in two AZA-R subclones is shown in the table.
